# Supplementary material for: Design of a unique anion framework in halospinels for outstanding performance of all solid-state Li-ion batteries: first-principles approach
Source: Royal Society of Chemistry journal article supplement (doi:10.1039/d1ta04084g), 2021-01-01
Supplement: d1ta04084g1.pdf [file d1ta04084g1.pdf]

## Supporting Information

### **Design of a Unique Anion Framework in Halospinel for Outstanding Performance of All Solid-state Li-ion Battery: First-principles Approach**

Hoje Chun<sup>1</sup>, Kyungju Nam<sup>2,3</sup>, Sung Jun Hong<sup>1</sup>, Joonhee Kang<sup>4\*</sup>, Byungchan Han<sup>1,2\*</sup>

<sup>1</sup> Department of Chemical and Biomolecular Engineering, Yonsei University, Seoul 03722, Republic of Korea

<sup>2</sup> Department of Vehicle Convergence Engineering, Yonsei University, Seoul 03722, Republic of Korea

<sup>3</sup> Institute of Fundamental and Advanced Technology, R&D Division, Hyundai Motor Company, Uiwang 16082,  
Republic of Korea

<sup>4</sup> Platform Technology Laboratory, Korea Institute of Energy Research, Daejeon 34129, Republic of Korea

- Computational Details
- Tables S1 to S7
- Figures S1 to S5

**Table S1.** The Haven ratio for  $\text{Li}_2\text{Sc}_{2/3}\text{X}_4$  ( $\text{X} = \text{Cl}, \text{Br}, \text{and I}$ ) from AIMD simulation at 800 K.

| $\text{Li}_2\text{Sc}_{2/3}\text{X}_4$ | Haven ratio |
|----------------------------------------|-------------|
| Cl                                     | 2.40        |
| Br                                     | 0.51        |
| I                                      | 0.97        |

**Table S2.** Phase equilibria at the interface between  $\text{LiCoO}_2$  and  $\text{Li}_2\text{Sc}_{2/3}\text{Cl}_4$  with the decomposition energies.

| Molar fraction | Phase equilibria                                                                       | Mutual reaction energy (meV/atom) |
|----------------|----------------------------------------------------------------------------------------|-----------------------------------|
| 0              | $\text{Li}_{17}\text{Sc}_5\text{Cl}_{32}$                                              | 0.00                              |
| 0.51           | $\text{ClO}_2, \text{Co}_3\text{O}_4, \text{Sc}_2\text{O}_3, \text{LiCl}$              | -42.14                            |
| 0.58           | $\text{Co}_3\text{O}_4, \text{Li}(\text{CoO}_2)_2, \text{Sc}_2\text{O}_3, \text{LiCl}$ | -47.42                            |
| 1              | $\text{LiCoO}_2$                                                                       | 0.00                              |

**Table S3.** Phase equilibria at the interface between  $\text{LiCoO}_2$  and  $\text{Li}_2\text{Sc}_{2/3}\text{Br}_4$  with the decomposition energies.

| Molar fraction | Phase equilibria                                             | Mutual reaction energy (meV/atom) |
|----------------|--------------------------------------------------------------|-----------------------------------|
| 0              | $\text{Li}_{17}\text{Sc}_5\text{Br}_{32}$                    | 0.00                              |
| 0.16           | Br, $\text{ScBrO}$ , $\text{CoBr}_2$ , LiBr                  | -68.02                            |
| 0.27           | Br, $\text{ScBrO}$ , CoO, LiBr                               | -81.53                            |
| 0.36           | Br, CoO, $\text{Sc}_2\text{O}_3$ , LiBr                      | -88.72                            |
| 0.45           | $\text{Sc}_2\text{O}_3$ , Br, $\text{Co}_3\text{O}_4$ , LiBr | -75.71                            |
| 1              | $\text{LiCoO}_2$                                             | 0.00                              |

**Table S4.** Phase equilibria at the interface between  $\text{LiCoO}_2$  and  $\text{Li}_2\text{Sc}_{2/3}\text{I}_4$  with the decomposition energies.

| Molar fraction | Phase equilibria                                                   | Mutual reaction energy (meV/atom) |
|----------------|--------------------------------------------------------------------|-----------------------------------|
| 0              | $\text{Li}_{17}\text{Sc}_5\text{I}_{32}$                           | 0.00                              |
| 0.16           | $\text{ScIO}$ , $\text{LiI}$ , $\text{I}$ , $\text{Co}$            | -94.92                            |
| 0.22           | $\text{LiI}$ , $\text{Sc}_2\text{O}_3$ , $\text{I}$ , $\text{Co}$  | -121.61                           |
| 0.36           | $\text{LiI}$ , $\text{Sc}_2\text{O}_3$ , $\text{I}$ , $\text{CoO}$ | -142.77                           |
| 0.43           | $\text{LiScO}_2$ , $\text{LiI}$ , $\text{I}$ , $\text{CoO}$        | -131.25                           |
| 1              | $\text{LiCoO}_2$                                                   | 0.00                              |

**Table S5.** Phase equilibria at the interface between  $\text{LiCoO}_2$  and  $\text{Li}_2\text{Sc}_{2/3}\text{Cl}_4$  with the decomposition energies under an applied potential of 3 V vs Li metal.

| Molar fraction | Phase equilibria                                                   | Mutual reaction energy (meV/atom) |
|----------------|--------------------------------------------------------------------|-----------------------------------|
| 0              | $\text{ScCl}_3$ , $\text{Cl}_2$                                    | 0.00                              |
| 0.17           | $\text{ScCl}_3$ , $\text{CoCl}_2$ , $\text{Cl}_2\text{O}$          | -112.90                           |
| 0.30           | $\text{ClO}_2$ , $\text{ScCl}_3$ , $\text{CoCl}_2$                 | -115.91                           |
| 0.79           | $\text{Co}_3\text{O}_4$ , $\text{ClO}_2$ , $\text{ScCl}_3$         | -74.91                            |
| 0.89           | $\text{ClO}_2$ , $\text{Co}_3\text{O}_4$ , $\text{Sc}_2\text{O}_3$ | -60.55                            |
| 1              | $\text{CoO}_2$                                                     | 0.00                              |

**Table S6.** Phase equilibria at the interface between  $\text{LiCoO}_2$  and  $\text{Li}_2\text{Sc}_{2/3}\text{Br}_4$  with the decomposition energies under an applied potential of 3 V vs Li metal.

| Molar fraction | Phase equilibria                               | Mutual reaction energy (meV/atom) |
|----------------|------------------------------------------------|-----------------------------------|
| 0              | $\text{ScBr}_3$ , $\text{Br}$                  | 0.00                              |
| 0.16           | $\text{ScBrO}$ , $\text{Br}$ , $\text{CoBr}_2$ | -121.06                           |

|      |                                                                     |         |
|------|---------------------------------------------------------------------|---------|
| 0.27 | ScBrO, Br, CoO                                                      | -156.91 |
| 0.36 | Br, CoO, Sc <sub>2</sub> O <sub>3</sub>                             | -179.96 |
| 0.45 | Co <sub>3</sub> O <sub>4</sub> , Br, Sc <sub>2</sub> O <sub>3</sub> | -176.51 |
| 1    | CoO <sub>2</sub>                                                    | 0.00    |

**Table S7.** Phase equilibria at the interface between LiCoO<sub>2</sub> and Li<sub>2</sub>Sc<sub>2/3</sub>I<sub>4</sub> with the decomposition energies under an applied potential of 3 V vs Li metal.

| Molar fraction | Phase equilibria                                                                                    | Mutual reaction energy (meV/atom) |
|----------------|-----------------------------------------------------------------------------------------------------|-----------------------------------|
| 0              | ScI <sub>3</sub> , I                                                                                | 0.00                              |
| 0.16           | ScIO, I, Co                                                                                         | -193.72                           |
| 0.22           | Co, Sc <sub>2</sub> O <sub>3</sub> , I                                                              | -253.91                           |
| 0.36           | Sc <sub>2</sub> O <sub>3</sub> , CoO, I                                                             | -334.50                           |
| 0.87           | Sc <sub>2</sub> O <sub>3</sub> , CoO, Co(IO <sub>3</sub> ) <sub>2</sub>                             | -212.65                           |
| 0.90           | Co <sub>3</sub> O <sub>4</sub> , Sc <sub>2</sub> O <sub>3</sub> , Co(IO <sub>3</sub> ) <sub>2</sub> | -201.22                           |
| 1              | CoO <sub>2</sub>                                                                                    | 0.00                              |

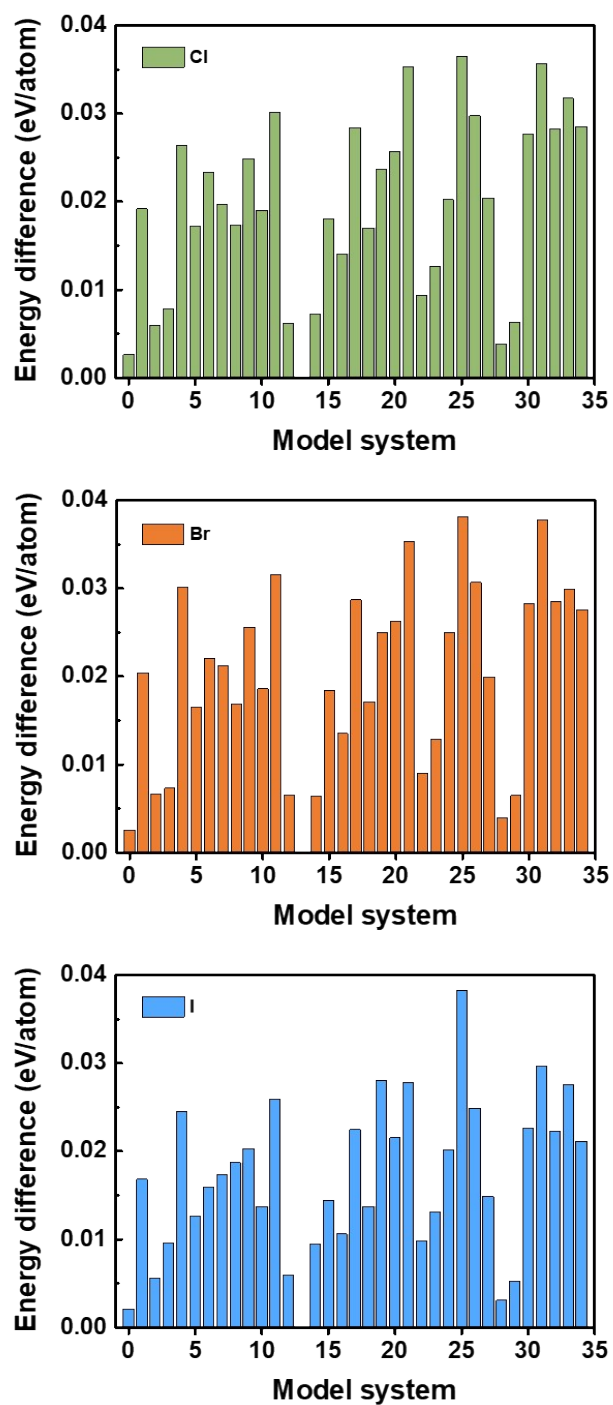

**Figure S1.** Energy differences of model systems of  $\text{Li}_{17}\text{Sc}_5\text{X}_{32}$  ( $\text{X} = \text{Cl}, \text{Br}, \text{and I}$ ) plotted with respect to the structure that is thermodynamically most stable.

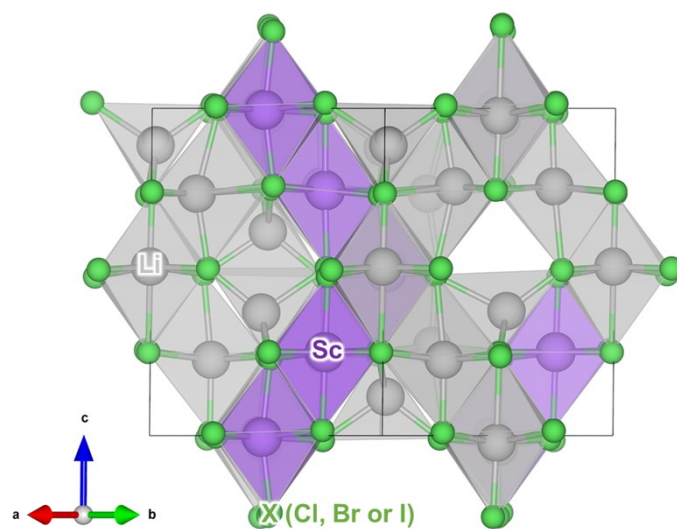

**Figure S2.** Thermodynamically most unstable structures of  $\text{Li}_2\text{Sc}_{2/3}\text{X}_4$ .

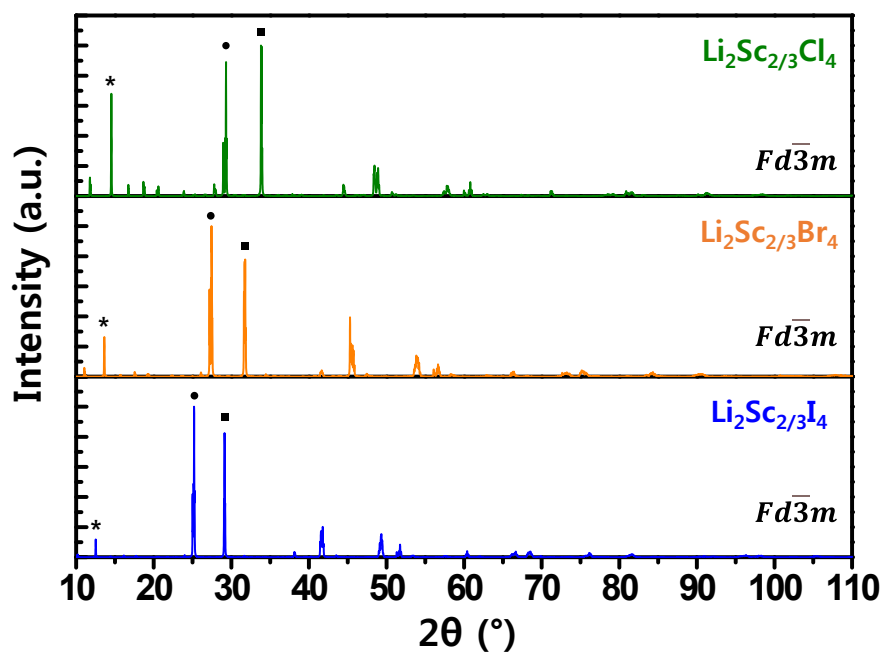

**Figure S3.** XRD patterns of  $\text{Li}_2\text{Sc}_{2/3}\text{X}_4$  (X = Cl, Br, and I). The experimental peaks are marked with symbols.

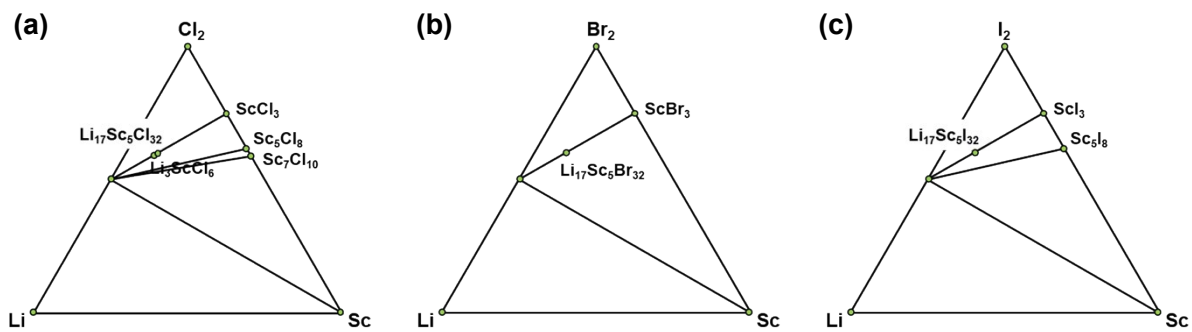

**Figure S4.** Gibbs triangle of the ternary chemical phase diagram of Li-Sc- $X_2$  ( $X =$  (a) Cl, (b) Br, and (c) I) with formulas of known compounds.

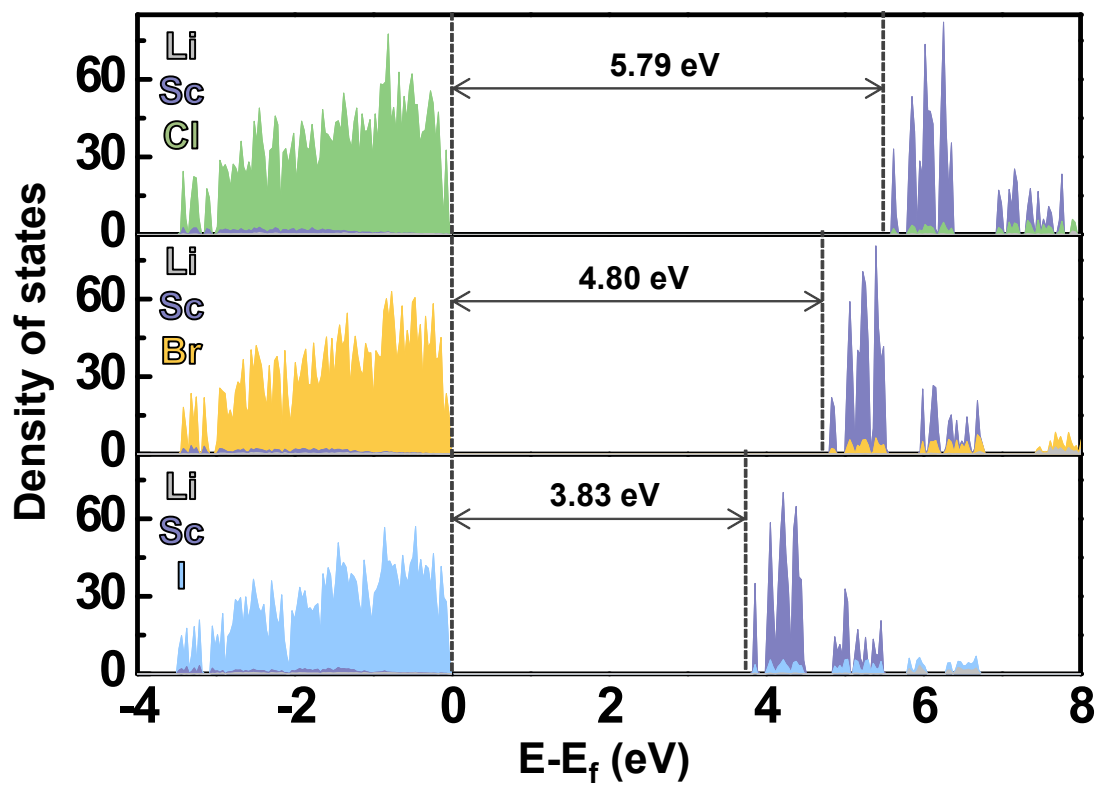

**Figure S5.** Electronic projected density of states (DOS) of  $Li_2Sc_{2/3}X_4$  ( $X =$  Cl, Br, and I) using HSE06 hybrid functionals.
